# Supplementary material for: Imidazolium Based Ionic Liquids: Unbiased Recovering of Vaporization Enthalpies from Infinite-Dilution Activity Coefficients
Source: MDPI journal article supplement (doi:10.3390/molecules26195873), 2021-09-28
Supplement: s1 [file s1]

## Imidazolium based Ionic Liquids: unbiased recovering of vaporization enthalpies from infinite-dilution activity coefficients

Sergey P. Verevkin<sup>a,b</sup>

<sup>a</sup>Department of Physical Chemistry and Department of „Science and Technology of Life, Light and Matter“, University of Rostock, 18059, Dr-Lorenz-Weg 2, Rostock, Germany

<sup>b</sup> Competence Centre CALOR, Faculty of Interdisciplinary Research, University of Rostock, 18059 Rostock, Germany

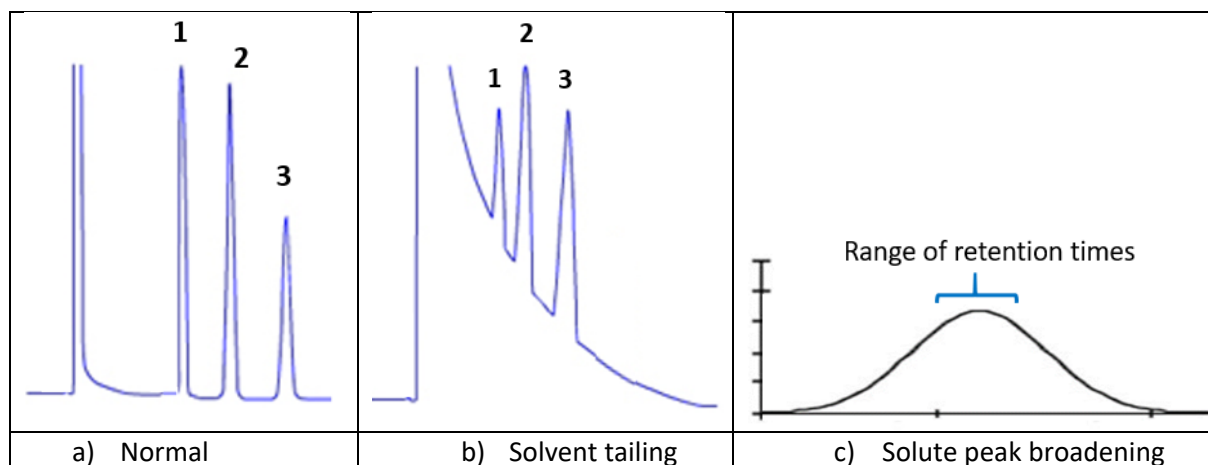

**Fig. S1.** Typical gas-chromatographic charts from  $\gamma_1^\infty$ -measurements.

1: n-pentane; 2: n-hexane, 3: n-heptane

**Table S1.** Data from Ref. [1] used for regression with Eq. (4 and 5) for [C<sub>6</sub>mim][SCN]: solubility parameters  $\delta_{298.15\text{ K}}$  of different solutes in at 298.15 K and the left part of Eq. (5)

| solute       | $\gamma_1^\infty(298.15\text{ K})$ | $\delta_{298.15\text{ K}}/\text{MPa}^{0.5}$ | Y <sup>a</sup> |
|--------------|------------------------------------|---------------------------------------------|----------------|
| Heptane      | 81.4                               | 15.2                                        | 0.0583         |
| Octane       | 95.7                               | 15.4                                        | 0.0648         |
| Nonane       | 120                                | 15.7                                        | 0.0705         |
| Decane       | 162                                | 15.8                                        | 0.0729         |
|              |                                    |                                             |                |
| Cyclopentane | 23.2                               | 16.6                                        | 0.0739         |
| Cyclohexane  | 28.2                               | 16.8                                        | 0.0809         |
| Cycloheptane | 25.8                               | 17.2                                        | 0.0934         |
| Cyclooctane  | 30.1                               | 17.4                                        | 0.0989         |
|              |                                    |                                             |                |
| Hex-1-ene    | 28.7                               | 14.9                                        | 0.0576         |
| Hept-1-ene   | 34.2                               | 15.3                                        | 0.0658         |
| Oct-1-ene    | 42.1                               | 15.5                                        | 0.0710         |
|              |                                    |                                             |                |
| Pent-1-yne   | 4.04                               | 16.2                                        | 0.0871         |
| Hex-1-yne    | 4.97                               | 16.4                                        | 0.0924         |
| Hept-1-yne   | 6.69                               | 16.4                                        | 0.0929         |
| Oct-1-yne    | 9.15                               | 16.4                                        | 0.0929         |
|              |                                    |                                             |                |
| Benzene      | 1.91                               | 18.8                                        | 0.1339         |
| Toluene      | 2.79                               | 18.2                                        | 0.1248         |
| Ethylbenzene | 4.32                               | 18.0                                        | 0.1194         |
| o-Xylene     | 3.53                               | 18.4                                        | 0.1268         |
| m-Xylene     | 4.37                               | 18.0                                        | 0.1202         |
| p-Xylene     | 4.18                               | 17.9                                        | 0.1192         |
|              |                                    |                                             |                |
| Methanol     | 0.532                              | 29.4                                        | 0.3450         |
| Ethanol      | 0.844                              | 26.1                                        | 0.2700         |
| Propan-1-ol  | 0.990                              | 24.5                                        | 0.2376         |
| Butan-1-ol   | 1.25                               | 23.3                                        | 0.2155         |
|              |                                    |                                             |                |
| Acetone      | 1.25                               | 19.6                                        | 0.1480         |
| Thiophene    | 1.24                               | 20.2                                        | 0.1615         |
| THF          | 1.60                               | 19.0                                        | 0.1386         |
| MTBE         | 8.78                               | 15.1                                        | 0.0717         |
| di-Et ether  | 8.67                               | 15.4                                        | 0.0707         |
| di-Pr ether  | 18.9                               | 15.6                                        | 0.0750         |
| di-Bu ether  | 33.9                               | 15.8                                        | 0.0801         |
|              |                                    |                                             |                |
| Water        | 0.59                               | 47.9                                        | 0.8953         |

<sup>a</sup>The left part of Eq. (5):  $Y = (\delta_1)^2/(RT) - \chi_{12}/V_1^*$

**Table S2** Data from Ref. [2] used for regression with Eq. (4 and 5) for [C<sub>6</sub>mim][CF<sub>3</sub>CO<sub>2</sub>]: solubility parameters  $\delta_{298.15\text{ K}}$  of different solutes in at 298.15 K and the left part of Eq. (5)

| solute              | $\delta_{298.15\text{ K}}/\text{MPa}^{0.5}$ | Y <sup>a</sup> |
|---------------------|---------------------------------------------|----------------|
| benzene             | 18.8                                        | 0.1325         |
| toluene             | 18.2                                        | 0.1238         |
| ethylbenzene        | 18.0                                        | 0.1194         |
| o-xylene            | 18.4                                        | 0.1266         |
| m-xylene            | 18.0                                        | 0.1202         |
| p-xylene            | 17.9                                        | 0.119          |
| 1-propanol          | 24.5                                        | 0.2563         |
| 2-propanol          | 23.6                                        | 0.2345         |
| 2-methyl-1-propanol | 22.9                                        | 0.2219         |
| acetonitrile        | 24.1                                        | 0.2230         |
| ethyl acetate       | 18.4                                        | 0.1267         |
| acetone             | 19.6                                        | 0.1426         |
| tetrahydrofuran     | 19.0                                        | 0.1357         |
| 1,4-dioxan          | 20.6                                        | 0.1639         |
| dichloromethane     | 20.2                                        | 0.1679         |
| trichloromethane    | 18.9                                        | 0.1631         |
| 1,2-dichloromethane | 20.3                                        | 0.1703         |
| chlorobenzene       | 19.5                                        | 0.1467         |
| bromobenzene        | 19.9                                        | 0.1558         |
| styrene             | 18.8                                        | 0.1366         |

<sup>a</sup>The left part of Eq. (5):  $Y = (\delta_1)^2/(RT) - \chi_{12}/V_1^*$

**Table S3** [C<sub>n</sub>mim][NTf<sub>2</sub>] series: comparison of  $\Delta_1^g H_m^o(298.15\text{ K})$ -values derived according to Eqs. 5 and 6 with experimental results from conventional methods

| IL                                       | $\Delta_1^g H_m^o(\text{exp})^a$ | $\Delta_1^g H_m^o(\text{GLC})^b$ | $\Delta_1^g H_m^o(\text{HE})^c$ | $F_{\text{im}}^d$ | Ref. <sup>e</sup> |
|------------------------------------------|----------------------------------|----------------------------------|---------------------------------|-------------------|-------------------|
| [C <sub>2</sub> mim][NTf <sub>2</sub> ]  | 127.7±1.8 [10]                   | 119.0                            | 121.3                           | 1.05              | 49                |
|                                          |                                  | 115.3                            | 119.3                           | 1.07              | 50                |
|                                          |                                  | 133.3                            |                                 |                   | 51                |
| [C <sub>4</sub> mim][NTf <sub>2</sub> ]  | 134.9±1.7 [10]                   | 129.2                            | 130.1                           | 1.04              | 52                |
|                                          |                                  |                                  | 128.8                           | 1.05              | 53                |
| [C <sub>6</sub> mim][NTf <sub>2</sub> ]  | 139.9±1.8 [10]                   | 133.9                            | 133.9                           | 1.04              | 45                |
|                                          |                                  | 131.4                            | 135.5                           | 1.03              | 46                |
|                                          |                                  | 143.5                            |                                 |                   | 47                |
|                                          |                                  |                                  | 138.0 <sup>f</sup>              | 1.01              | 45,48             |
| [C <sub>8</sub> mim][NTf <sub>2</sub> ]  | 147.1±2.0 [10]                   | 145.8                            | 143.8                           | 1.02              | 46                |
| [C <sub>10</sub> mim][NTf <sub>2</sub> ] | 154.6±2.5 [10]                   | 151.1                            | 152.5                           | 1.01              | 54                |
| [C <sub>12</sub> mim][NTf <sub>2</sub> ] | 161.5±1.8 [10]                   |                                  | 157.0                           | 1.03              | 55                |
|                                          |                                  |                                  |                                 | 1.04±0.01         |                   |

<sup>a</sup> Experimental values derived from different conventional techniques and evaluated and reported in our recent papers.

<sup>b</sup> Estimated according to Eqs. 5 and 6 using  $\gamma_1^\infty$ -values for all solutes reported in original papers.

<sup>c</sup> Estimated according to Eqs. 5 and 6 using  $\gamma_1^\infty$ -values only for n-alkanes and alcohols reported in original papers.

<sup>d</sup> Correction factor  $F_{\text{im}} = \Delta_1^g H_m^o(\text{exp}) / \Delta_1^g H_m^o(\text{HM})$ .

<sup>e</sup> References for the experimental  $\gamma_1^\infty$ -values are the same as in the main text.

<sup>f</sup> Combination of  $\gamma_1^\infty$ -data set of alcohols [48] with the  $\gamma_1^\infty$ -data set for n-alkanes [45].

**Table S4** [C<sub>n</sub>mim][CF<sub>3</sub>CO<sub>2</sub>] series: comparison of  $\Delta_1^g H_m^o(298.15\text{ K})$ -values derived according to Eqs. 5 and 6 with experimental results from conventional methods <sup>a</sup>

| IL                                                     | $\Delta_1^g H_m^o(\text{exp})$ | $\Delta_1^g H_m^o(\text{GLC})$ | $\Delta_1^g H_m^o(\text{HE})$ | $F_{\text{im}}$ | Ref. |
|--------------------------------------------------------|--------------------------------|--------------------------------|-------------------------------|-----------------|------|
| [C <sub>2</sub> mim][CF <sub>3</sub> CO <sub>2</sub> ] | 126.4±1.5 [26]                 | 122.3                          | 118.5                         | 1.07            | 56   |
| [C <sub>6</sub> mim][CF <sub>3</sub> CO <sub>2</sub> ] | 141.5±1.9 [26]                 | 183.2                          |                               |                 | 43   |
|                                                        |                                |                                |                               | 1.07±0.09       |      |

<sup>a</sup> The definition of symbols is the same as in Table S3.

**Table S5** [C<sub>n</sub>mim][Anion] series with [CF<sub>3</sub>SO<sub>3</sub>], [CH<sub>3</sub>SO<sub>3</sub>], and [Cl]: comparison of  $\Delta_1^g H_m^o$ (298.15 K)-values derived according to Eqs. 5 and 6 with experimental results from conventional methods<sup>a</sup>

| IL                                                     | $\Delta_1^g H_m^o$ (exp) | $\Delta_1^g H_m^o$ (GLC) | $\Delta_1^g H_m^o$ (HE) | F <sub>im</sub> | Ref.  |
|--------------------------------------------------------|--------------------------|--------------------------|-------------------------|-----------------|-------|
| [C <sub>2</sub> mim][CF <sub>3</sub> SO <sub>3</sub> ] | 134.2±2.5[27]            | 108.0                    | 106.5                   | 1.26            | 57    |
| [C <sub>4</sub> mim][CF <sub>3</sub> SO <sub>3</sub> ] | 138.7±2.4[27]            | 116.7 <sup>b</sup>       | 114.9                   | 1.21            | 58,59 |
|                                                        |                          | 121.2                    | 118.6                   | 1.17            | 60    |
| [C <sub>6</sub> mim][CF <sub>3</sub> SO <sub>3</sub> ] | 146.1±2.4[27]            | 137.6 <sup>c</sup>       |                         | 1.21±0.03       | 61    |
| [C <sub>2</sub> mim][CH <sub>3</sub> SO <sub>3</sub> ] | 141.4±1.9[28]            | 120.5                    | 112.2                   | 1.26            | 62    |
|                                                        |                          | 111.8                    | 112.9                   | 1.25            | 63    |
|                                                        |                          | 122.7                    | 114.7                   | 1.23            | 64    |
| [C <sub>4</sub> mim][CH <sub>3</sub> SO <sub>3</sub> ] | 149.8±2.1[28]            | 126.5                    | 128.9                   | 1.16            | 65    |
|                                                        |                          |                          |                         | 1.23±0.02       |       |
| [C <sub>4</sub> mim][Cl]                               | 153.3±1.9[66]            | 140.5                    | 128.9                   | 1.19            | 65    |
| [C <sub>6</sub> mim][Cl]                               | 160.5±2.4[66]            | 132.2                    | 125.7                   | 1.28            | 67    |
| [C <sub>8</sub> mim][Cl]                               | 166.8±3.8[66]            |                          | 139.7                   | 1.19            | 65    |
|                                                        |                          |                          |                         | 1.22±0.03       |       |

<sup>a</sup> The definition of symbols is the same as in Table S3.

<sup>b</sup> Combination of  $\gamma_1^\infty$ -data set of n-alkanes [58] with the  $\gamma_1^\infty$ -data set for alcohols [59].

<sup>c</sup> Estimated from data set containing  $\gamma_1^\infty$ -values only for alkylbenzenes and low polar solutes

**Table S6** [C<sub>n</sub>mim][Anion] series with fluorine-containing anions: comparison of  $\Delta_1^g H_m^o$ (298.15 K)-values derived according to Eqs. 5 and 6 with experimental results from conventional methods <sup>a</sup>

| IL                                      | $\Delta_1^g H_m^o$ (exp) | $\Delta_1^g H_m^o$ (GLC) | $\Delta_1^g H_m^o$ (HE) | F <sub>im</sub>   | Ref.  |
|-----------------------------------------|--------------------------|--------------------------|-------------------------|-------------------|-------|
| [C <sub>2</sub> mim][BF <sub>4</sub> ]  | 130.5±2.9[16]            | 101.1                    | 98.5                    | 1.32              | 68    |
|                                         |                          | 95.3                     |                         |                   | 69    |
| [C <sub>4</sub> mim][BF <sub>4</sub> ]  | 138.3±2.7[16]            | 106.5                    | 103.8                   | 1.33              | 70    |
|                                         |                          | 105.0                    | 102.5                   | 1.35              | 71    |
|                                         |                          | 96.4                     | 95.8                    | 1.44              | 68    |
|                                         |                          | 99.3                     | 95.6 <sup>c</sup>       | 1.45              | 72,73 |
|                                         |                          |                          | 92.1 <sup>c</sup>       | 1.50              | 71,74 |
|                                         |                          |                          | 97.6 <sup>c</sup>       | 1.42              | 71,75 |
| [C <sub>6</sub> mim][BF <sub>4</sub> ]  | 146.8±2.7[16]            | 118.4                    |                         |                   | 76    |
|                                         |                          | 107.9                    | 107.5                   | 1.37              | 68    |
|                                         |                          |                          | 107.9 <sup>c</sup>      | 1.36              | 68,75 |
| [C <sub>8</sub> mim][BF <sub>4</sub> ]  | 152.8±2.8[16]            | 117.0                    | 114.8                   | 1.33              | 77    |
|                                         |                          | 116.7                    | 114.6                   | 1.33              | 68    |
|                                         |                          | 142.9                    | 131.4                   | 1.16              | 70    |
| [C <sub>10</sub> mim][BF <sub>4</sub> ] | 158.3±2.8[16]            | 132.4                    |                         |                   | 78    |
| [C <sub>12</sub> mim][BF <sub>4</sub> ] | 167.3±2.9                |                          | 126.4                   | 1.32 <sup>e</sup> | 79    |
|                                         |                          |                          | 124.7                   | 1.34 <sup>f</sup> | 79    |
| [C <sub>14</sub> mim][BF <sub>4</sub> ] | 179.4±3.1                |                          | 141.4                   | 1.27 <sup>e</sup> | 79    |
|                                         |                          |                          | 131.1                   | 1.37 <sup>f</sup> | 79    |
| [C <sub>16</sub> mim][BF <sub>4</sub> ] | 180.5±3.5 <sup>d</sup>   | 143.6                    | 136.7                   | 1.32              | 80    |
|                                         |                          |                          |                         | 1.35±0.15         |       |
| [C <sub>4</sub> mim][PF <sub>6</sub> ]  | 146.5±2.6[13]            | 96.0                     | 96.1                    | 1.52              | 81    |
|                                         |                          | 75.4                     | 93.3 <sup>c</sup>       | 1.57              | 81,82 |
|                                         |                          | 124.5                    | 94.0 <sup>c</sup>       | 1.56              | 81,83 |
|                                         |                          |                          | 96.8                    | 1.51              | 84    |
|                                         |                          |                          | 93.4 <sup>c</sup>       | 1.57              | 48,81 |
| [C <sub>6</sub> mim][PF <sub>6</sub> ]  | 150.8±2.7[13]            | 111.0                    |                         |                   | 85    |
|                                         |                          | 85.7                     | 92.3                    | 1.63              | 86    |
| [C <sub>8</sub> mim][PF <sub>6</sub> ]  | 154.9±2.8[13]            | 128.7 <sup>c</sup>       |                         |                   | 86,87 |
|                                         |                          | 128.5                    | 123.6                   | 1.25              | 87    |
|                                         |                          | 115.0                    | 110.9                   | 1.40              | 88    |
|                                         |                          |                          |                         | 1.50±0.04         |       |
| [C <sub>2</sub> mim][FAP] <sup>g</sup>  | 126.4±1.9[89]            | 130.1                    | 133.8                   | 0.94              | 90    |
|                                         |                          | 123.3                    | 127.0                   | 1.00              | 91    |
| [C <sub>6</sub> mim][FAP] <sup>g</sup>  | 141.5±1.9[89]            | 158.0                    | 148.9                   | 0.95              | 62    |
|                                         |                          |                          |                         | 0.96±0.02         |       |

<sup>a</sup> The definition of symbols is the same as in Table S3.

<sup>b</sup> Experimental data on alcohols were absent in this data set.

<sup>c</sup> Combination of  $\gamma_1^\infty$ -data set of alcohols with the  $\gamma_1^\infty$ -data set for n-alkanes reported in different papers, as given in the last column.

<sup>d</sup> Extrapolated value based on experimental data [16].

<sup>e</sup> Activity coefficients were measure in the liquid phase.

<sup>f</sup> Activity coefficients were measure in the liquid-crystal phase.

<sup>g</sup> [FAP] = tris(pentafluoroethyl)trifluorophosphate anion.

**Table S7** [C<sub>n</sub>mim][NO<sub>3</sub>] series: comparison of  $\Delta_1^g H_m^o$  (298.15 K)-values derived according to Eqs. 5 and 6 with experimental results from conventional methods <sup>a</sup>

| IL                                     | $\Delta_1^g H_m^o$ (exp) | $\Delta_1^g H_m^o$ (GLC) | $\Delta_1^g H_m^o$ (HE) | F <sub>im</sub> | Ref. |
|----------------------------------------|--------------------------|--------------------------|-------------------------|-----------------|------|
| [C <sub>2</sub> mim][NO <sub>3</sub> ] | 158.1±5.3[92]            | 90.0                     | 88.0                    | 1.80            | 93   |
| [C <sub>4</sub> mim][NO <sub>3</sub> ] | 162.3±5.3[92]            | 109.5                    | 108.3                   | 1.50            | 94   |
| [C <sub>4</sub> mim][NO <sub>3</sub> ] | 162.3±5.3[92]            | 112.3                    | 106.1                   | 1.53            | 95   |
| [C <sub>6</sub> mim][NO <sub>3</sub> ] | 170.1±5.3[92]            | 121.6 <sup>b</sup>       | 108.8                   | 1.56            | 96   |
| [C <sub>8</sub> mim][NO <sub>3</sub> ] | 177.9±5.3[92]            | 136.5                    | 131.3                   | 1.35            | 97   |
|                                        |                          |                          |                         | 1.55±0.07       |      |

<sup>a</sup> The definition of symbols is the same as in Table S3.

<sup>b</sup> The  $\gamma_1^\infty$ -data set for n-alkanes were not reported in the original work. They were assessed in this work according to the trend with the chain-length.

**Table S8** [C<sub>n</sub>mim][Anion] series with cyano-containig anions: comparison of  $\Delta_1^g H_m^o$  (298.15 K)-values derived according to Eqs. 5 and 6 with experimental results from conventional methods <sup>a</sup>

| IL                         | $\Delta_1^g H_m^o$ (exp) | $\Delta_1^g H_m^o$ (GLC) | $\Delta_1^g H_m^o$ (HE) | F <sub>im</sub> | Ref. |
|----------------------------|--------------------------|--------------------------|-------------------------|-----------------|------|
| [C <sub>2</sub> mim][SCN]  | 153.6±1.8[104,105]       | 100.9                    | 96.3                    | 1.60            | 98   |
| [C <sub>4</sub> mim][SCN]  | 156.9±2.5[104]           | 116.4                    | 113.9                   | 1.38            | 99   |
| [C <sub>6</sub> mim][SCN]  | 164.7±3.0[104]           | 122.8                    | 118.9                   | 1.39            | 39   |
|                            |                          |                          |                         | 1.46±0.07       |      |
| [C <sub>2</sub> mim][DCA]  | 155.6±3.1[3,5]           | 102.8                    | 100.3                   | 1.55            | 100  |
| [C <sub>4</sub> mim][DCA]  | 162.9±3.4[3,5]           | 113.9                    | 115.7                   | 1.41            | 101  |
|                            |                          |                          |                         | 1.48±0.07       |      |
| [C <sub>2</sub> mim][TCM]  | 140.3±3.0[5,106]         | 100.8                    | 101.4                   | 1.38            | 102  |
| [C <sub>4</sub> mim][TCM]  | 146.9±3.0[5,106]         | 117.7                    | 115.6                   | 1.27            | 103  |
|                            |                          |                          |                         | 1.33±0.06       |      |
| [C <sub>2</sub> mim][TCB]  | 130.1±2.5[107]           | 98.1                     | 96.7                    | 1.35            | 108  |
|                            |                          | 94.4                     | 92.6                    | 1.40            | 109  |
| [C <sub>6</sub> mim][TCB]  | 143.0±2.3[107]           | 120.8                    | 119.5                   | 1.20            | 110  |
| [C <sub>10</sub> mim][TCB] | 157.1±2.5[107]           | 155.1                    | 153.1                   | 1.03            | 111  |
|                            |                          |                          |                         | 1.24±0.08       |      |

<sup>a</sup> The definition of symbols is the same as in Table S3.

[SCN] = thio-cyanate; [DCA] = di-cyano-amide; [TCM] = tri-cyano-methane, and [TCB] = tetra-cyano-borate.

## References

- 1 U. Domanska, M. Krolikowska and M. Arasimowicz, M. Phase Equilibria of (1-Hexyl-3-methylimidazolium Thiocyanate + Water, Alcohol, or Hydrocarbon) Binary Systems. *J. Chem. Eng. Data*, 2010, **55**, 773–777.
- 2 L.-K. Jiang, L.-S. Wang, C.-J. Du and X.-Y Wang, Activity coefficients at infinite dilution of organic solutes in 1-hexyl-3-methylimidazolium trifluoroacetate and influence of interfacial adsorption using gas–liquid chromatography. *J. Chem. Thermodyn.*, 2014, **70**, 138–146.
